# Supplementary material
Source: PubMed Central journal article supplement (PMC8346836)
Supplement: pnas.2104610118.sapp.pdf [file pnas.2104610118.sapp.pdf]

## **Supplementary Information for Microplastics destabilize lipid membranes by mechanical stretching**

**Movie S1 (separate file).** 1  $\mu\text{m}$  red fluorescent PS microplastics in contact with a lipid bilayer under red fluorescence with the length bar provided in Fig. 2A; 1 frame = 0.1 second.

**Movie S2 (separate file).** Enlarged and inverted colors version of the Supp Movie 1 in black-and-white. 1 frame = 0.1 second and 100  $\mu\text{m}$  = 285 pixels.

**Movie S3 (separate file).** 8  $\mu\text{m}$  PMMA microplastics in contact with a lipid bilayer under bright light. 1 frame = 2 seconds.
